# Supplementary material for: Evolution favors protein mutational robustness in sufficiently large populations
Source: PubMed Central journal article supplement (PMC1995189; doi:10.1186/1741-7007-5-29), 2007-07-17
Supplement: 1741-7007-5-29-S3.pdf [file 1741-7007-5-29-S3.pdf]

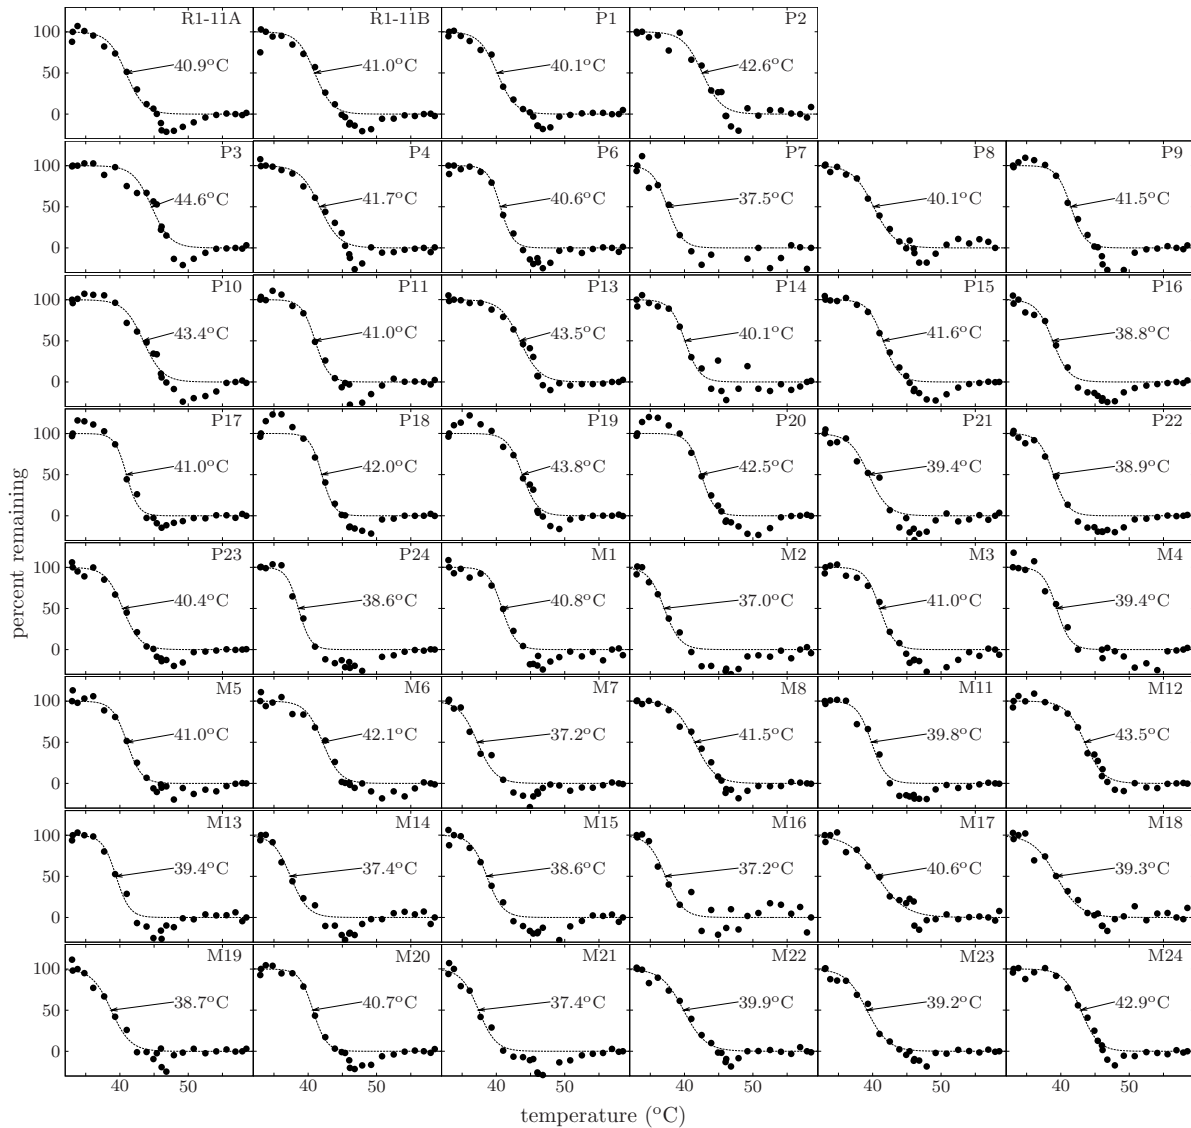

**Thermostability measurements.** The stability to irreversible thermal denaturation was quantified as  $T_{50}$ , the temperature at which half of the protein irreversibly denatured after a 10 minute incubation. Curves show the percent of the protein remaining after incubation at the indicated temperatures. The  $T_{50}$  was determined by fitting the data to a sigmoidal curve of the form  $f(t) = 100 / (1 + e^{a(T-T_{50})})$  where  $T$  is the temperature and  $f(T)$  is the percent of protein remaining at temperature  $T$ .
