# Supplementary material for: Evolution favors protein mutational robustness in sufficiently large populations
Source: PubMed Central journal article supplement (PMC1995189; doi:10.1186/1741-7007-5-29), 2007-07-17
Supplement: 1741-7007-5-29-S4.pdf [file 1741-7007-5-29-S4.pdf]

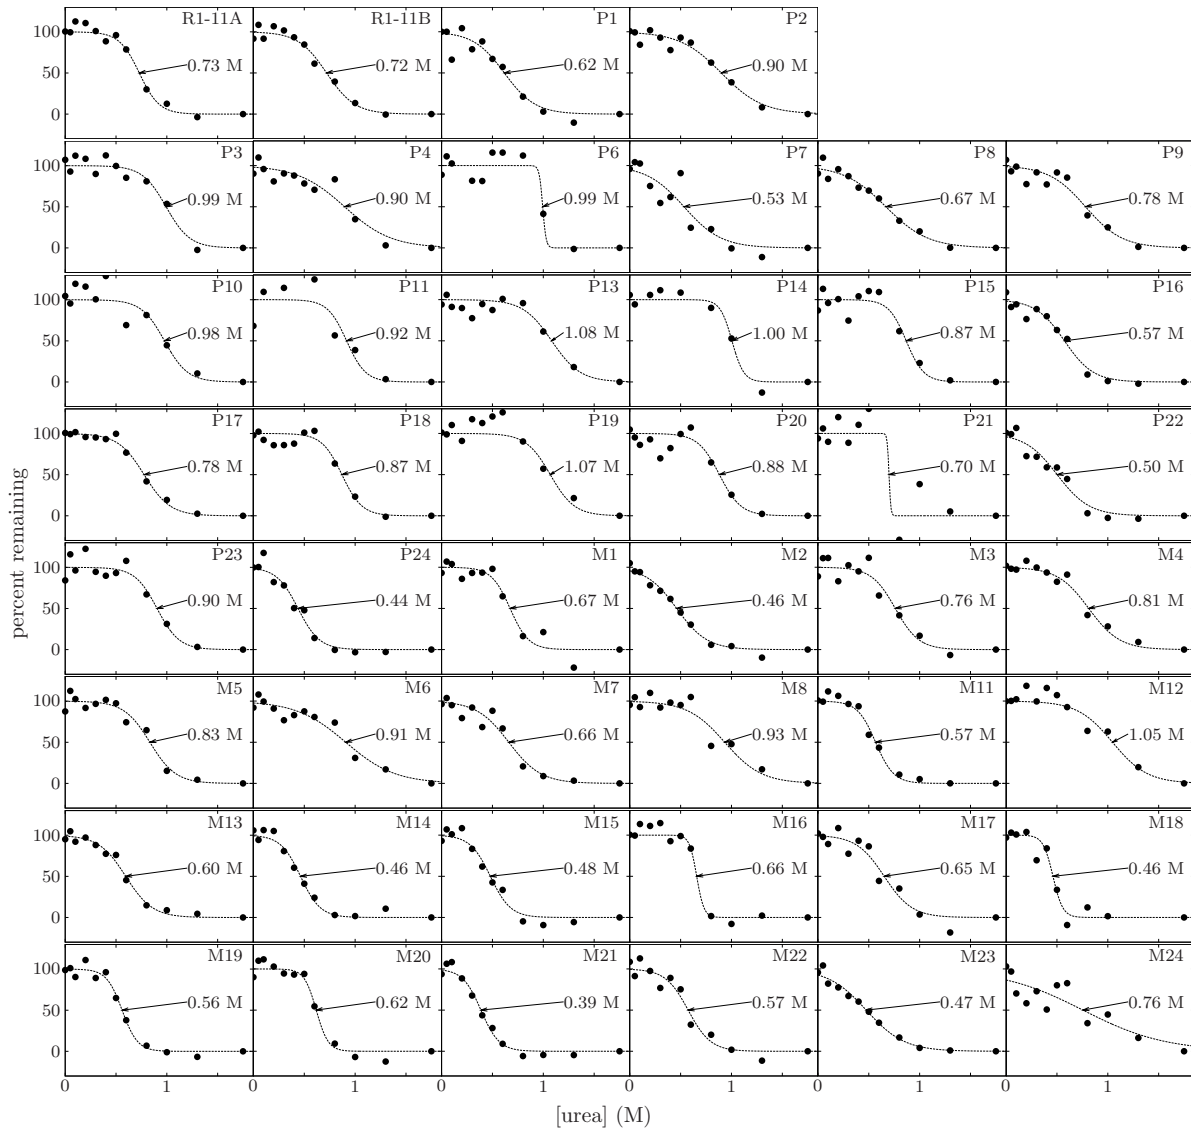

**Urea stability measurements.** The stability to irreversible urea denaturation was quantified as the  $[\text{urea}]_{50}$ , the urea concentration at which half of the protein irreversibly denatured after a 4 hour incubation at room temperature. Curves show the percent of the protein remaining after incubation at the indicated urea concentrations. The  $[\text{urea}]_{50}$  was determined by fitting the data to a sigmoidal curve of the form  $f(u) = 100 / (1 + e^{a(u - [\text{urea}]_{50})})$  where  $u$  is the urea concentration and  $f(u)$  is the percent of protein remaining at urea concentration  $u$ .
