# Supplementary material for: Evolution favors protein mutational robustness in sufficiently large populations
Source: PubMed Central journal article supplement (PMC1995189; doi:10.1186/1741-7007-5-29), 2007-07-17
Supplement: 1741-7007-5-29-S5.pdf [file 1741-7007-5-29-S5.pdf]

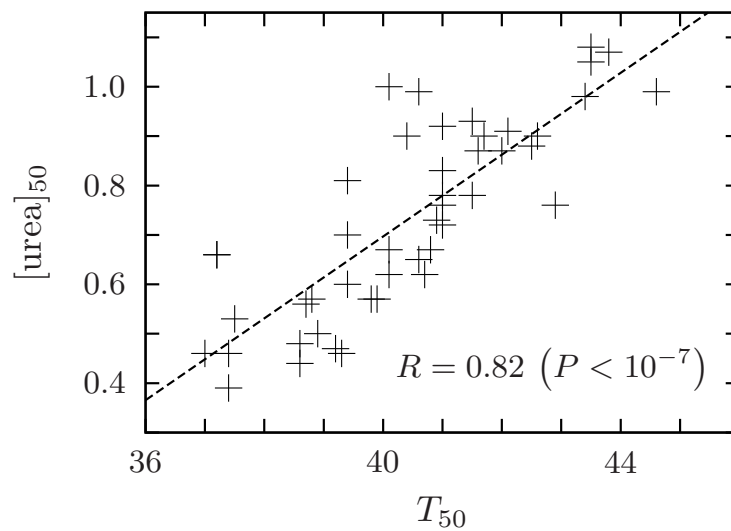

**Correlation of thermal and urea stabilities.** The  $T_{50}$  and  $[\text{urea}]_{50}$  stability measurements are highly correlated, indicating that they consistently measure a universal aspect of protein stability. The Pearson correlation coefficient is  $R = 0.82$ , with a probability of  $P \approx 10^{-7}$  that a correlation this large would be observed among the 46 measurements by chance.
